# Supplementary material for: In Vitro Expansion of Anti-viral T Cells from Cord Blood by Accelerated Co-cultured Dendritic Cells
Source: PubMed Central journal article supplement — Mol Ther Methods Clin Dev. 2018 Dec 31;13:112–20. doi: 10.1016/j.omtm.2018.12.010 (PMC6357851; doi:10.1016/j.omtm.2018.12.010), 2018-12-31
Supplement: mmc1.pdf [file mmc1.pdf]

OMTM, Volume 13

## **Supplemental Information**

### ***In Vitro* Expansion of Anti-viral T Cells from Cord Blood by Accelerated Co-cultured Dendritic Cells**

**Klaudia Kuranda, Sophie Caillat-Zucman, Sylvaine You, and Roberto Mallone**

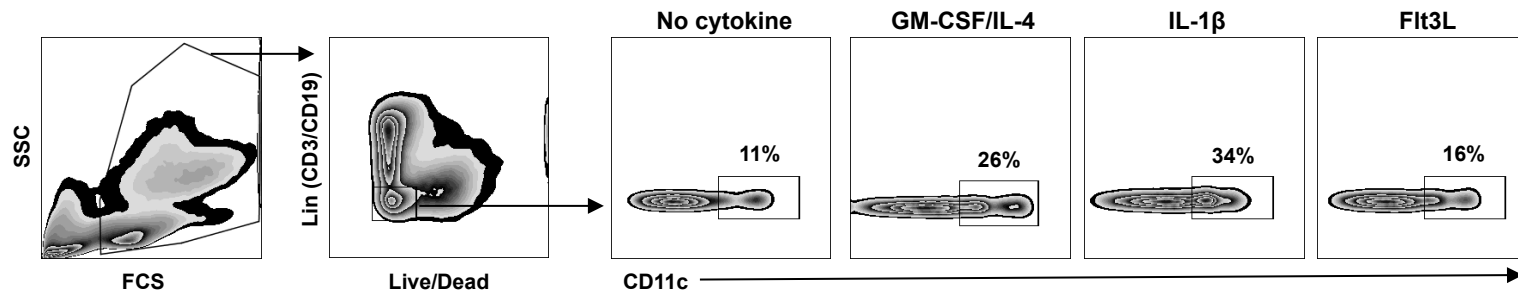

**Supplementary Figure 1: Gating strategy employed for the phenotypic characterization of acDCs.** PBMCs/CBMCs ( $2 \times 10^6$ /well in 48-well plates) were cultured for 24 h with GM-CSF/IL-4, IL-1 $\beta$ , Flt3L or no cytokines, followed by addition of TNF- $\alpha$ , PGE2, IL-1 $\beta$  and low-dose IL-7 for another 24 h. Cells were recovered at the end of this 48 h culture and analyzed by flow cytometry. T cells, B cells and dead cells were excluded on the basis of CD3/CD19 and Live/Dead staining. Cells positive for CD11c (high and low) were selected and further analyzed for the expression of CD14, HLA-DR, CD80 and CD86 (see Figure 1).
